# Supplementary figures and images for: Investigating the Underlying Mechanisms of Ardisia japonica Extract’s Anti-Blood-Stasis Effect via Metabolomics and Network Pharmacology
Source: MDPI journal article supplement (doi:10.3390/molecules28217301), 2023-10-27

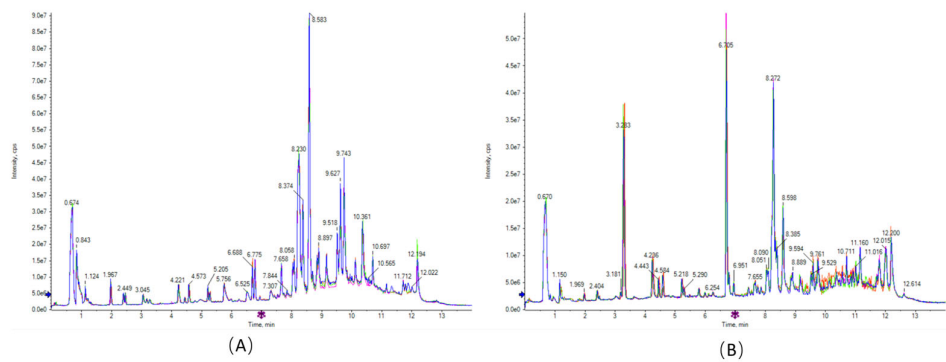

**Figure S1.** TICof non-targeted metabolomics (A) positive ion mode; (B) negative ion mode.

Supplement: s1 [file s1]
